# Supplementary material for: Facile one-pot synthesis of NiCo2Se4-rGO on Ni foam for high performance hybrid supercapacitors
Source: Royal Society of Chemistry journal article supplement (doi:10.1039/c9ra06439g), 2019-01-01
Supplement: c9ra06439g1.pdf [file c9ra06439g1.pdf]

# Facile One-Pot Synthesis of NiCo<sub>2</sub>Se<sub>4</sub>-rGO on Ni foam for High Performance Hybrid Supercapacitor

Bahareh Golrokh Amin, Jahangir Masud, Manashi Nath

*Department of Chemistry, Missouri University of Science and Technology*

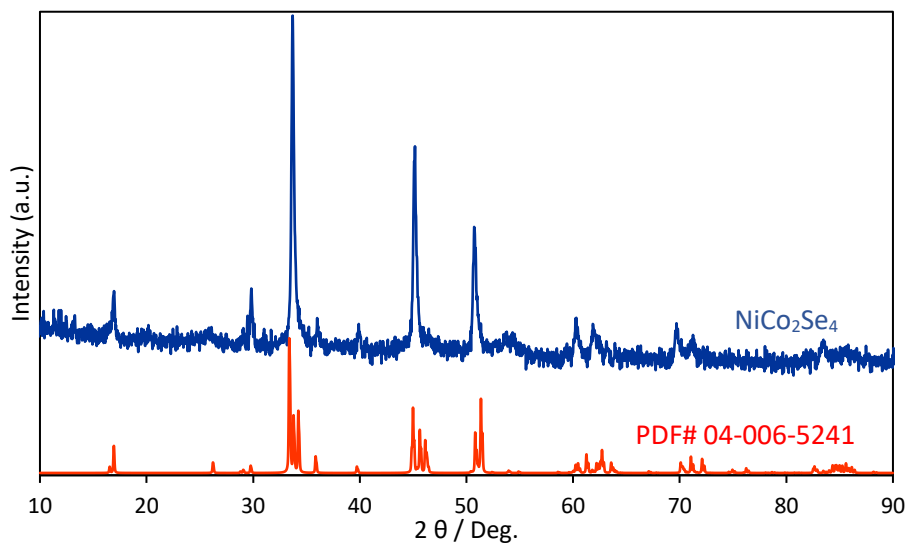

Fig. S1 XRD patterns of NiCo<sub>2</sub>Se<sub>4</sub> along with the reference spectra (PDF No. 04-006-5241)

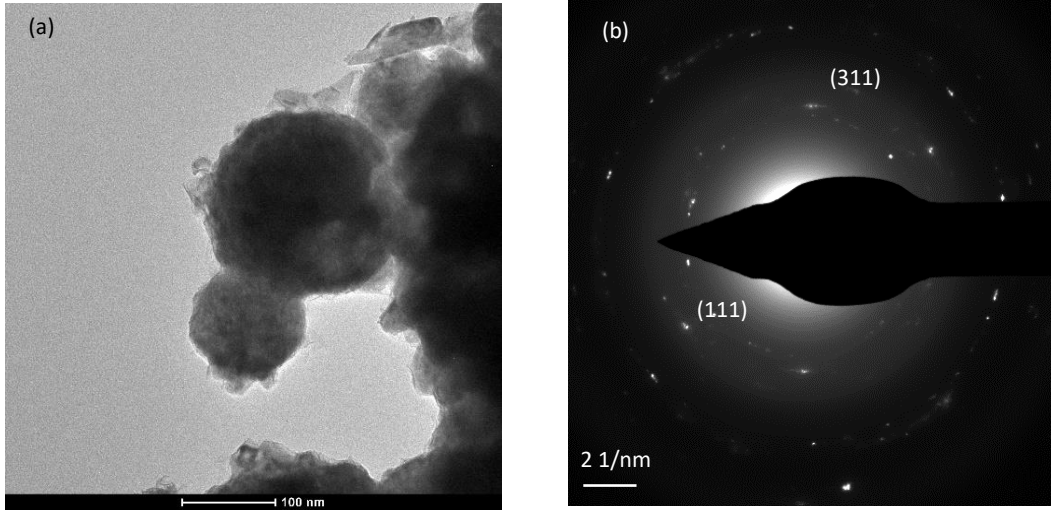

Fig. S2 TEM (a) and SAED (b) of  $\text{NiCo}_2\text{Se}_4$ .

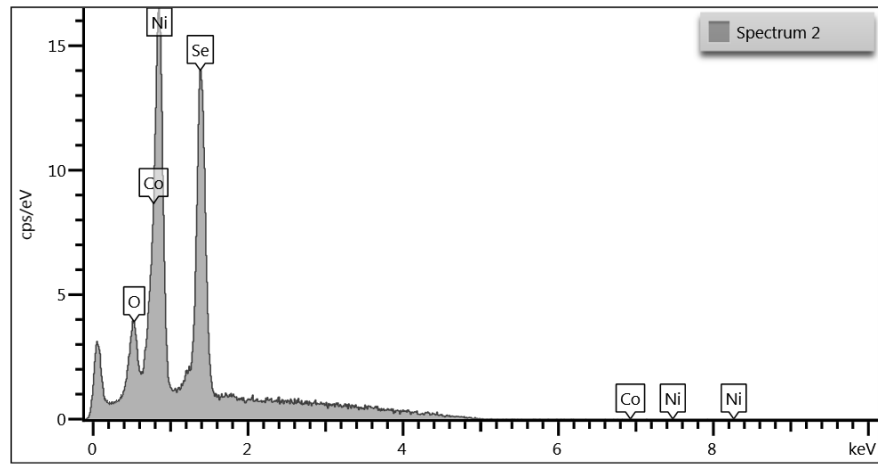

Fig. S3 EDS analysis of  $\text{NiCo}_2\text{Se}_4$ .

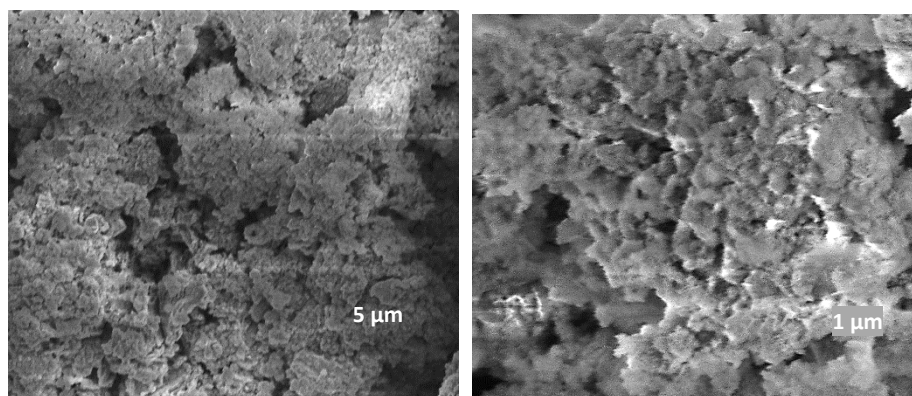

Fig. S4 SEM images of  $\text{NiCo}_2\text{Se}_4$  with different magnification.

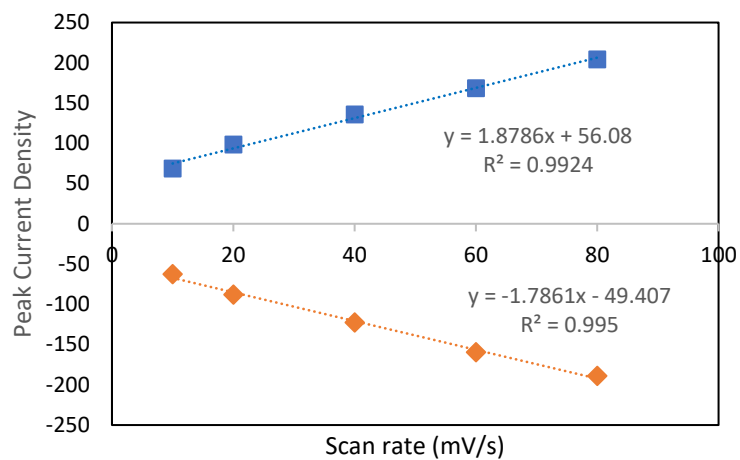

Fig. S5 Relationship between the oxidation and reduction peak currents as a function of the scan rate.

**Table S1.** Comparison of previously reported catalysts in energy storage applications

| Electrode                                             | Specific Capacitance                | Energy Density (Wh kg <sup>-1</sup> ) | Power Density (W kg <sup>-1</sup> ) | Ref.             |
|-------------------------------------------------------|-------------------------------------|---------------------------------------|-------------------------------------|------------------|
| NiCo <sub>2</sub> S <sub>4</sub>                      | 1440 @ 3 A g <sup>-1</sup>          | 28.3                                  | 245                                 | 1                |
| Ni <sub>0.85</sub> Se on Ni foam                      | 1115 @ 1 A g <sup>-1</sup>          | 32.2                                  | 789.6                               | 2                |
| Ni <sub>1.5</sub> Co <sub>1.5</sub> S <sub>4</sub>    | 1093 @ 1 A g <sup>-1</sup>          | 37.6                                  | 775                                 | 3                |
| Co <sub>0.85</sub> Se                                 | 1378 @ 1 A g <sup>-1</sup>          | 39.7                                  | 789.6                               | 4                |
| NiSe <sub>2</sub>                                     | 1044 @ 3 A g <sup>-1</sup>          | 44.8                                  | 969.7                               | 5                |
| Mo <sub>9</sub> Se <sub>11</sub>                      | 601 @ 1 A g <sup>-1</sup>           | 42                                    | 960                                 | 6                |
| MoSe <sub>2</sub> on Ni foam                          | 2020 @ 1 A g <sup>-1</sup>          | -                                     | -                                   | 7                |
| NiCo <sub>2</sub> S <sub>4</sub>                      | 1612.95 @ 5 A g <sup>-1</sup>       | 56                                    | -                                   | 8                |
| NiCo <sub>2</sub> Se <sub>4</sub> @carbon microsphere | 1394 @ 0.5 A g <sup>-1</sup>        | 101                                   | 749                                 | 9                |
| NiCo <sub>2</sub> O <sub>4</sub> / rGO                | 947.4 @ 0.5 A g <sup>-1</sup>       | -                                     | -                                   | 10               |
| NiCo <sub>2</sub> O <sub>4</sub> / rGO                | 1388 @ 0.5 A g <sup>-1</sup>        | 57                                    | 375                                 | 11               |
| <b>NiCo<sub>2</sub>Se<sub>4</sub>/rGO@NF</b>          | <b>2038.55 @ 1 A g<sup>-1</sup></b> | <b>67.01</b>                          | <b>903.61</b>                       | <b>This work</b> |

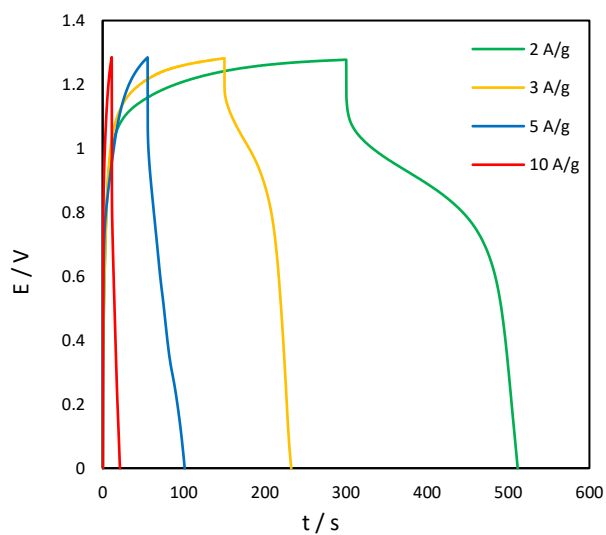

Fig. S6 Charge-discharge plots at different current densities for a symmetrical full cell capacitor with NiCo<sub>2</sub>Se<sub>4</sub>-rGO used as both cathode and anode.

#### References:

1. Y. Zhu, Z. Wu, M. Jing, X. Yang, W. Song, X. Ji, *Journal of Power Sources*, 2015, 273, 584-590.
2. C. Gong, M. Huang, J. Zhang, M. Lai, L. Fan, J. Lina, J. Wu, *RSC Adv.*, 2015, 5, 81474-81481.
3. H. Chen, J. Jiang, Y. Zhao, L. Zhang, D. Guoa, D. Xia, *J. Mater. Chem. A*, 2015,3, 428-437.
4. C. Gong, M. Huang, P. Zhou, Z. Sun, L. Fan, J. Lin, J. Wu, *Applied Surface Science*, 2016, 362, 30, 469-476.
5. S. Wang, W. Li, L. Xin, M. Wu, Y. Long, H. Huang, X. Lou, *Chem. Eng. J.*, 2017, 330, 1334 – 1341.

6. R.A. Aziz, S.K. Muzakir, I.I. Misnon, J. Ismail, R. Jose, J. Alloys Compd., 2016, 673, 390-398.
7. X. Liu, J.-Z. Zhang, K.-J. Huang, P. Hao, Chem. Eng. J., 2016, 302, 437–445.
8. S. Srinivasa Rao, I. K. Durga, N. Kundakarla, D. Punnoose, C. V. V. M. Gopi, A. E. Reddy, M. Jagadeesh, and H.-J. Kim, New J. Chem., 2017, 41, 10037–10047.
9. Y. Li, L. Xu, M. Jia, L. L. Cui, J. Gao, and X.-J. Jin, Journal of The Electrochemical Society, 2018, 165, 303-310.
10. L. Ma, X. Shen, H. Zhou, Z. Ji, K. Chen, G. Zhu, Chemical Engineering Journal, 2015, 262, 980–988.
11. Q. Li, C. Lu, C. Chen, L. Xie, Y. Liu, Y. Li, Q. Kong, H. Wang, Energy Storage Materials, 2017, 8, 59–6760.
